# Supplementary material for: Cyano benzene functionalised Ni and Cu bisdithiolene complexes
Source: Royal Society of Chemistry journal article supplement (doi:10.1039/d3ce00782k), 2023-01-01
Supplement: d3ce00782k1.pdf [file d3ce00782k1.pdf]

## Supplementary Material for

### Cyano Benzene Functionalized Ni and Cu Bisdithiolene Complexes

António Costa,<sup>[a]</sup> Gonçalo Lopes,<sup>[a]</sup> Susana Ribeiro,<sup>[a]</sup> Isabel C. Santos,<sup>[a]</sup> Dulce Simão,<sup>[b]</sup> Laura C.J. Pereira,<sup>[a]</sup> Nolwenn Le Breton,<sup>[c]</sup> Sylvie Choua,<sup>[c]</sup> Stéphane A. Baudron,<sup>[d]</sup> Manuel Almeida,<sup>[a]</sup> Sandra Rabaça\*<sup>[a]</sup>

- 
- [a] A. Costa, G. Lopes, S. Ribeiro, Dr. I.C. Santos, Dr. L.C.J. Pereira, Dr. M. Almeida, Dr. S. Rabaça  
Centro de Ciências e Tecnologias Nucleares, IST-ID, Departamento de Engenharia e  
Tecnologias Nucleares, IST  
Universidade de Lisboa  
Estrada Nacional 10, 2695-066 Bobadela LRS, Portugal.  
E-mail: sandrar@ctn.tecnico.ulisboa.pt
- [b] Dr. D. Simão  
Centro de Química Estrutural, IST-ID, Departamento de Engenharia Química, IST,  
Universidade de Lisboa  
Av. Rovisco Pais, 1049-001, Lisboa, Portugal
- [c] Dr. N. Le Breton, S. Choua  
Institut de Chimie, UMR CNRS 7177,  
Université de Strasbourg  
Institut Le Bel, 4 rue Blaise Pascal, 67000 Strasbourg, France
- [d] Dr. Stéphane A. Baudron  
CNRS, CMC UMR 7140  
Université de Strasbourg,  
4 rue Blaise Pascal, CS 90032, 67081 Strasbourg Cedex, France

**Table SM1:** Cyclic voltammetry data of  $[M(L)_2]$  ( $M = Ni, Cu$ );  $L = 3\text{-cbdt}$  and  $4\text{-cbdt}$  in acetonitrile (ref.  $Ag/AgNO_3$ )

|                         | $[M(L)_2]^0/[M(L)_2]^-$ (V) | $[M(L)_2]^-/[M(L)_2]^{2-}$ (V) | Solvent  | Ref       |
|-------------------------|-----------------------------|--------------------------------|----------|-----------|
| $[Ni(4\text{-cbdt})_2]$ | +0.20                       | -0.51                          | $CH_3CN$ | 1         |
| $[Ni(3\text{-cbdt})_2]$ | +0.281                      | -0.31                          | $CH_3CN$ | This work |
| $[Cu(4\text{-cbdt})_2]$ | +0.69                       | -0.64                          | $CH_3CN$ | 1         |
| $[Cu(3\text{-cbdt})_2]$ | +0.71                       | -0.61                          | $CH_3CN$ | This work |

1. Cerdeira, Ana C., et al. "Synthesis, structure and physical properties of transition metal bis 4-cyanobenzene-1, 2-dithiolate complexes  $[M(\text{cbdt})_2]^{z-}$  ( $M = Zn, Co, Cu, Au, Ni, Pd$ ,  $z = 0, 1, 2$ )." *Polyhedron* 44.1 (2012): 228-237.

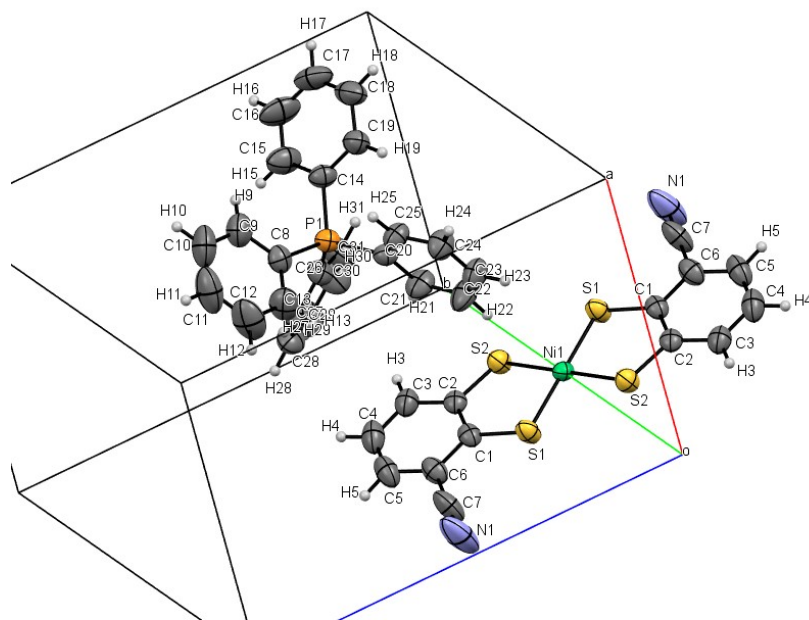

**Figure SM1.** ORTEP diagram of  $\alpha 1$ .

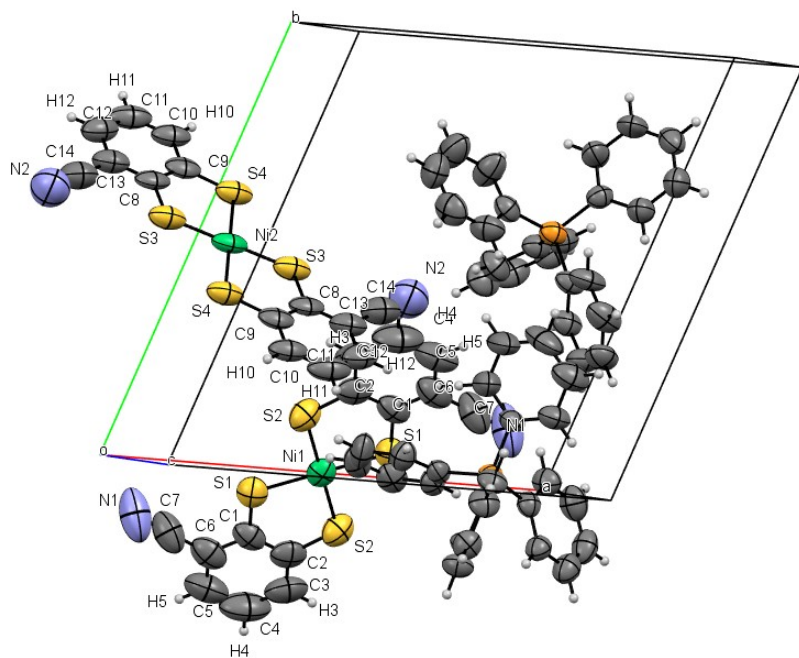

Figure SM2. ORTEP diagram of **1 $\beta$** . For clarity, the TPP numbering scheme was omitted.

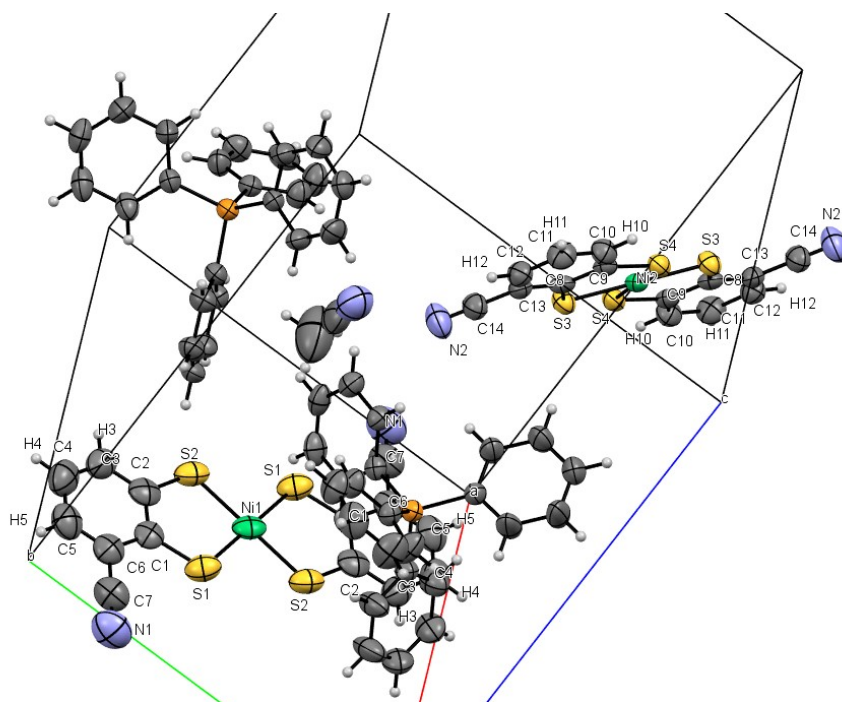

**Figure SM3.** ORTEP diagram of **1CH<sub>3</sub>CN**. For clarity, the TPP numbering scheme was omitted.

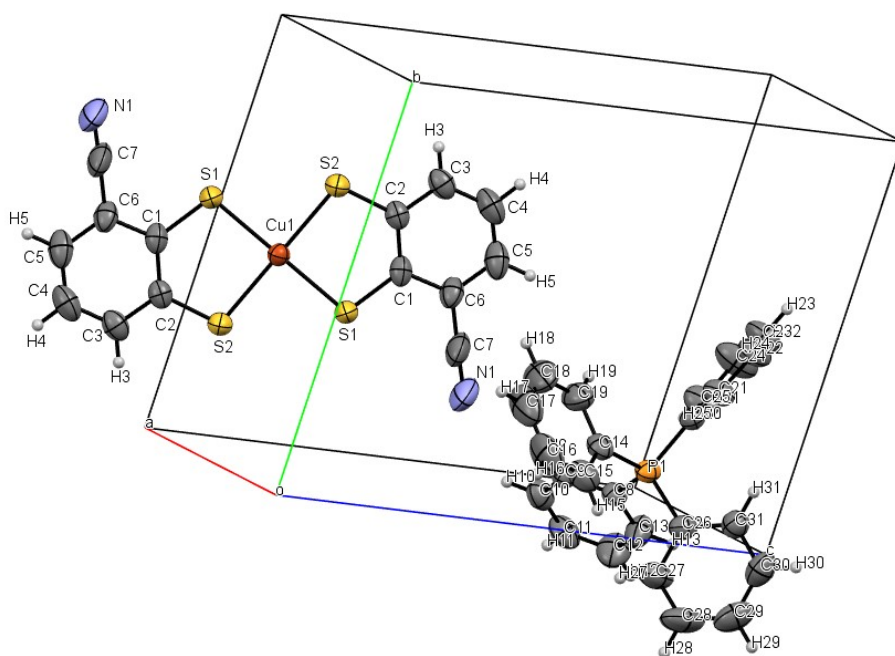

**Figure SM4.** ORTEP diagram of  **$\alpha$ 3**.

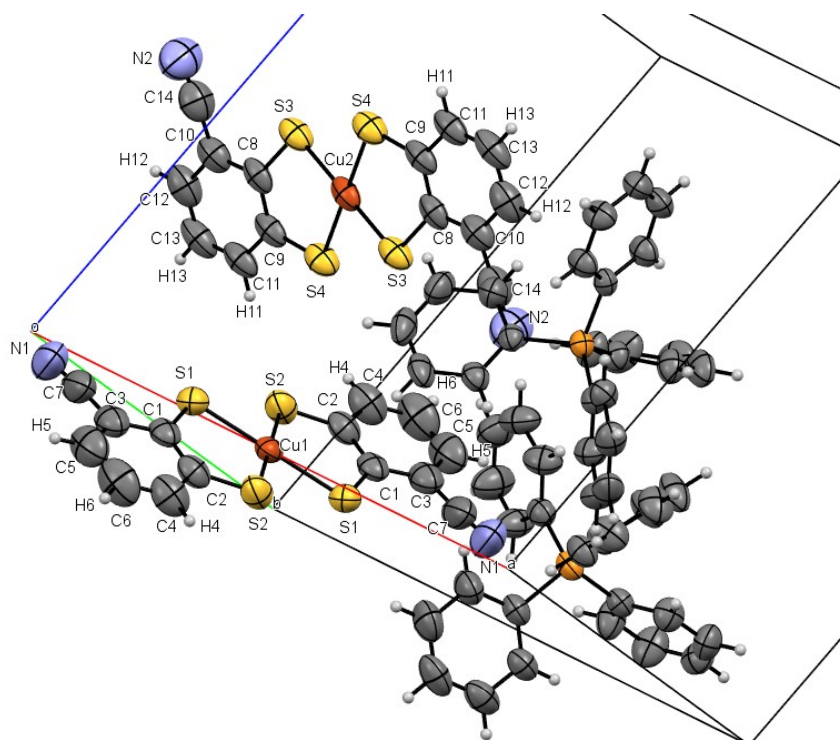

Figure SM5. ORTEP diagram of  **$\beta$ 3**. For clarity, the TPP numbering scheme was omitted.

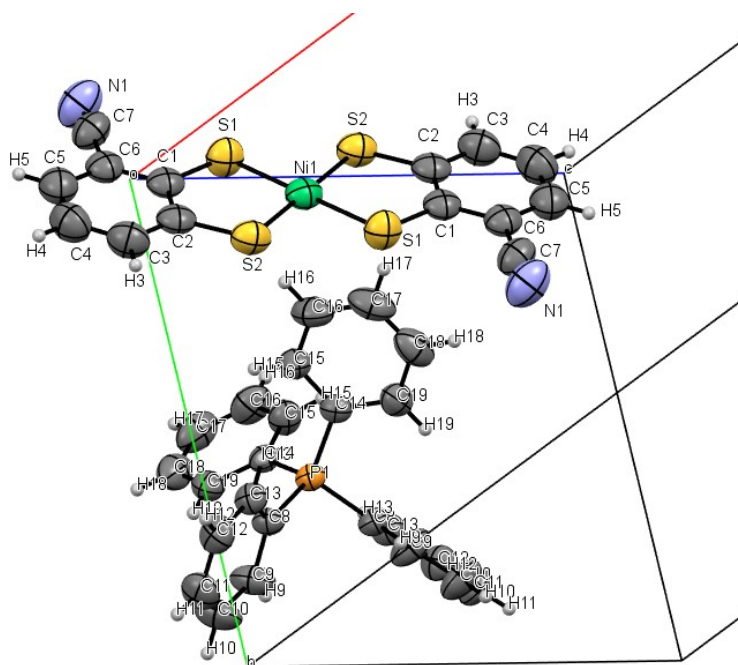

Figure SM6. ORTEP diagram of  **$\alpha$ 2**.

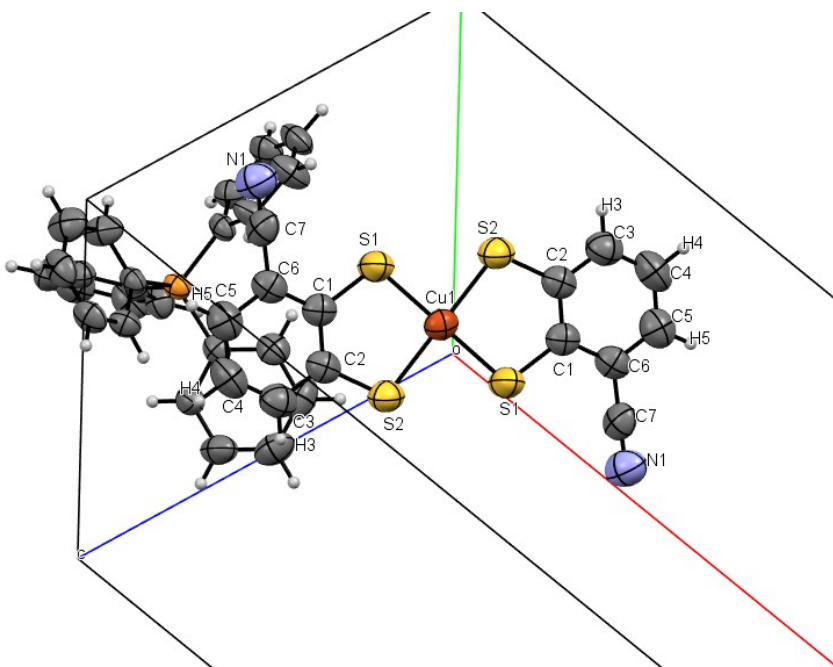

**Figure SM7.** ORTEP diagram of  $\alpha 4$ . For clarity, the TPP numbering scheme was omitted.

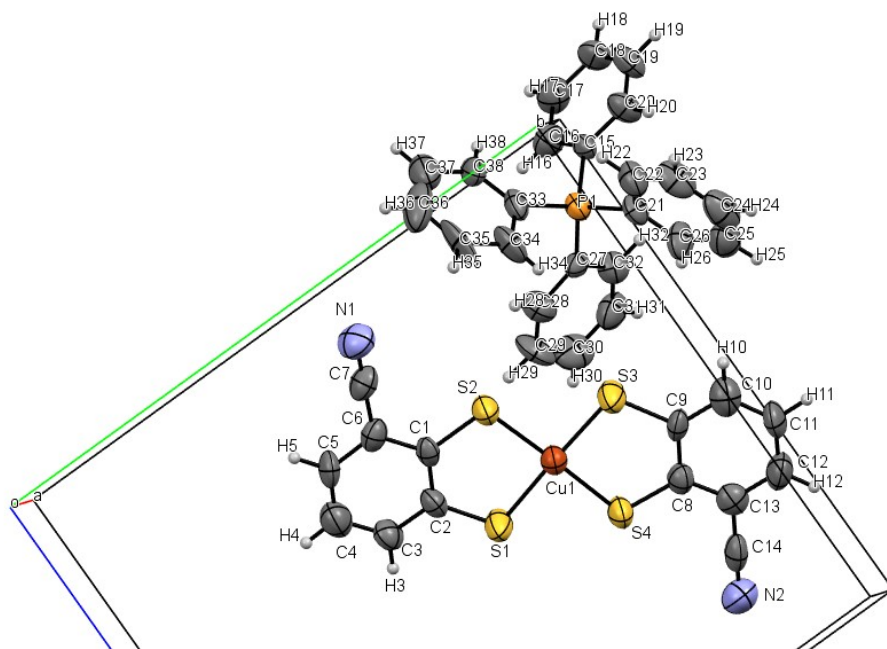

**Figure SM8.** ORTEP diagram of  $\beta 4$ .

**Table SM2:** Intermolecular bond lengths (Å) in dianionic and monanionic dithiolene complexes  $[\text{Ni}(\text{3-cbd})_2]^{-n}$ , ( $n=1, 2$ .)

| 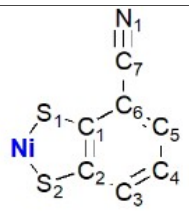 | dianion     |            |          | monoanion   |
|-------------------------------------------------------------------------------------|-------------|------------|----------|-------------|
|                                                                                     | $\alpha$ -1 | $\beta$ -1 | 1.CH3CN  | 2- $\alpha$ |
| Ni-S1                                                                               | 2.1664      | 2.176      | 2.176    | 2.1552      |
|                                                                                     |             | 2.140      | 2.140    |             |
| Ni-S2                                                                               | 2.1793      | 2.168      | 2.168    | 2.1407      |
|                                                                                     |             | 2.189      | 2.189    |             |
| S1-C1                                                                               | 1.733(2)    | 1.737(7)   | 1.737(7) | 1.726(4)    |
|                                                                                     |             | 1.737(6)   | 1.737(6) |             |
| S2-C2                                                                               | 1.744(2)    | 1.72(1)    | 1.72(1)  | 1.742(3)    |
|                                                                                     |             | 1.718(7)   | 1.718(7) |             |
| C1-C2                                                                               | 1.406(3)    | 1.41(1)    | 1.41(1)  | 1.395(4)    |
|                                                                                     |             | 1.397(9)   | 1.397(9) |             |
| C2-C3                                                                               | 1.397(3)    | 1.39(1)    | 1.39(1)  | 1.397(5)    |

|       |          |          |          |          |
|-------|----------|----------|----------|----------|
|       |          | 1.408(8) | 1.408(8) |          |
| C3-C4 | 1.382(4) | 1.41(2)  | 1.41(2)  | 1.368(5) |
|       |          | 1.36(1)  | 1.36(1)  |          |
| C4-C5 | 1.369(4) | 1.37(2)  | 1.37(2)  | 1.384(6) |
|       |          | 1.36(1)  | 1.36(1)  |          |
| C6-C5 | 1.400(4) | 1.39(1)  | 1.39(1)  | 1.366(5) |
|       |          | 1.41(1)  | 1.41(1)  |          |
| C1-C6 | 1.414(3) | 1.41(2)  | 1.41(2)  | 1.423(4) |
|       |          | 1.38(1)  | 1.38(1)  |          |
| C6-C7 | 1.429(4) | 1.42(2)  | 1.42(2)  | 1.436(5) |
|       |          | 1.40(1)  | 1.40(1)  |          |
| C7-N1 | 1.142(4) | 1.15(1)  | 1.15(1)  | 1.136(5) |
|       |          | 1.15(1)  | 1.15(1)  |          |

**Table SM2:** Intermolecular bond lengths (Å) in dianionic and monoanionic dithiolene complexes  $[\text{Cu}(3\text{-cbdt})_2]^{-n}$ , ( $n=1, 2$ ).

| 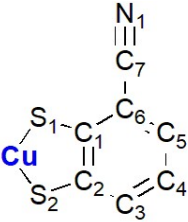 | dianion     |            | monoanion   |            |
|-------------------------------------------------------------------------------------|-------------|------------|-------------|------------|
|                                                                                     | $\alpha$ -3 | $\beta$ -3 | $\alpha$ -4 | $\beta$ -4 |
| Cu-S1                                                                               | 2.2536      | 2.287      | 2.172       | 2.183(4)   |
|                                                                                     |             | 2.262      |             | 2.171(4)   |
| Cu-S2                                                                               | 2.2769      | 2.2539     | 2.170       | 2.163(4)   |
|                                                                                     |             | 2.2814     |             | 2.183(4)   |
| S1-C1                                                                               | 1.726(3)    | 1.746(3)   | 1.740(6)    | 1.75(1)    |
|                                                                                     |             | 1.751(3)   |             | 1.73(1)    |
| S2-C2                                                                               | 1.739(3)    | 1.734(4)   | 1.753(6)    | 1.72(1)    |
|                                                                                     |             | 1.740(4)   |             | 1.78(1)    |
| C1-C2                                                                               | 1.409(4)    | 1.405(5)   | 1.373(7)    | 1.39(2)    |
|                                                                                     |             | 1.407(5)   |             | 1.42(2)    |



|       |          |          |          |         |
|-------|----------|----------|----------|---------|
| C2-C3 | 1.394(5) | 1.404(5) | 1.38(1)  | 1.36(2) |
|       |          | 1.400(4) |          | 1.38(2) |
| C3-C4 | 1.376(5) | 1.377(9) | 1.38(1)  | 1.38(2) |
|       |          | 1.370(6) |          | 1.36(2) |
| C4-C5 | 1.365(6) | 1.367(8) | 1.379(9) | 1.36(2) |
|       |          | 1.369(6) |          | 1.38(2) |
| C6-C5 | 1.408(6) | 1.403(6) | 1.38(1)  | 1.38(2) |
|       |          | 1.403(5) |          | 1.36(2) |
| C1-C6 | 1.409(4) | 1.411(7) | 1.410(8) | 1.41(2) |
|       |          | 1.397(6) |          | 1.38(2) |
| C6-C7 | 1.434(5) | 1.437(8) | 1.424(8) | 1.45(2) |
|       |          | 1.430(6) |          | 1.43(2) |
| C7-N1 | 1.140(6) | 1.150(8) | 1.131(8) | 1.14(2) |
|       |          | 1.146(6) |          |         |

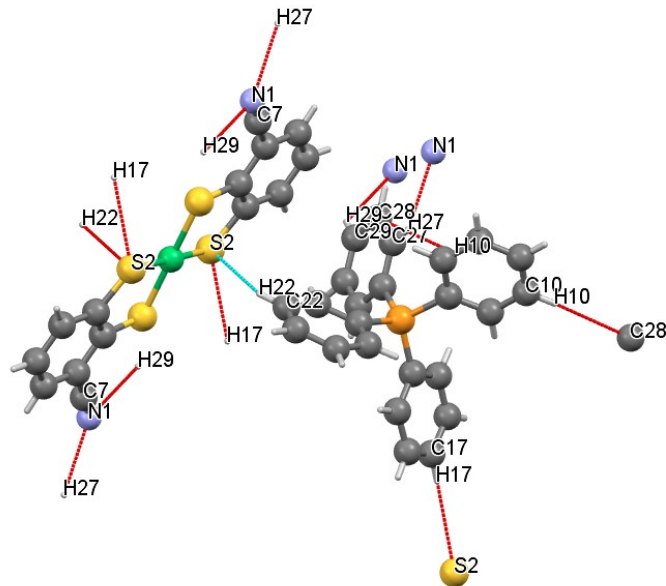

**Table SM3:** Short contacts list of compound  $\alpha 1$

|               | Short Contacts  | Symmetry operation (*) | Length (Å) | Length- $\Sigma$ VdW (Å) |                      |
|---------------|-----------------|------------------------|------------|--------------------------|----------------------|
| anion-anion   | C5...C5         | -x,1-y,11-z            | 3.446      | 0.046                    | $\pi \dots \pi^{*1}$ |
|               | C5-H5...H5      | -x,1-y,-z              | 2.943      | 0.043                    | C-H... $\pi^{*1}$    |
| cation-cation | C10-H10...C27   | 1-x, 2-y,1-z           | 2.994      | 0.094                    | C-H... $\pi$         |
|               | C10-H10...C28   | 1-x, 2-y,1-z           | 2.820      | -0.080                   | C-H... $\pi$         |
| anion-cation  | S2...H17        | 1-x,2-y,-z             | 2.933      | -0.067                   |                      |
|               | S2...H22        | x,y,z                  | 2.965      | -0.035                   |                      |
|               | C25-H25...C4    | 1+x,y,z                | 2.975      | 0.075                    | C-H... $\pi$         |
|               | C25-H25...C3    | 1+x,y,z                | 2.910      | 0.010                    | C-H... $\pi$         |
|               | C25-H25...C2    | 1+x,y,z                | 2.907      | 0.007                    | C-H... $\pi$         |
|               | C27-H27...N1-C7 | -x,1-y,1-z             | 2.532      | -0.218                   | C-H...N $\equiv$ C   |
|               | C29-H29...N1-C7 | x,1+y,x                | 2.729      | -0.021                   | C-H...N $\equiv$ C   |

\*1 offset pi/pi stacking

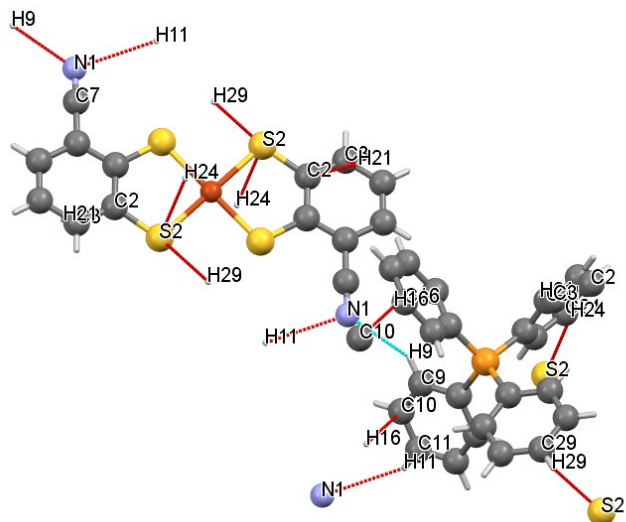

**Table SM4:** Short contacts list of compound  $\alpha$ -3

|               | Short Contacts  | Symmetry operation (*) | Length (Å) | Length- $\Sigma$ VdW (Å) |                    |
|---------------|-----------------|------------------------|------------|--------------------------|--------------------|
| anion-anion   | C5...C5         | 1-x,1-y,1-z            | 3.440      | 0.040                    | $\pi... \pi^{*1}$  |
|               | C5...H5         | 1-x,1-y,1-z            | 2.929      | 0.029                    | C-H... $\pi^{*1}$  |
| cation-cation | C16-H16...C9    | -x,-y,1-z              | 2.992      | 0.092                    | C-H... $\pi$       |
|               | C16-H16...C10   | -x,-y,1-z              | 2.832      | -0.068                   | C-H... $\pi$       |
| anion-cation  | S2...H29        | 1+x,1+y,-1+z           | 2.932      | -0.068                   |                    |
|               | S2...H24        | 1-x,1-y,1-z            | 2.980      | -0.020                   |                    |
|               | C21-H21...C2    | -x,1-y,1-z             | 2.899      | -0.001                   | C-H... $\pi$       |
|               | C21-H21...C3    | -x,1-y,1-z             | 2.896      | -0.004                   | C-H... $\pi$       |
|               | C9-H9...N1-C7   | x,y,z                  | 2.529      | -0.221                   | C-H...N $\equiv$ C |
|               | C11-H11...N1-C7 | 1-x,-y,1-z             | 2.747      | -0.003                   | C-H...N $\equiv$ C |

\*1 offset pi/pi stacking

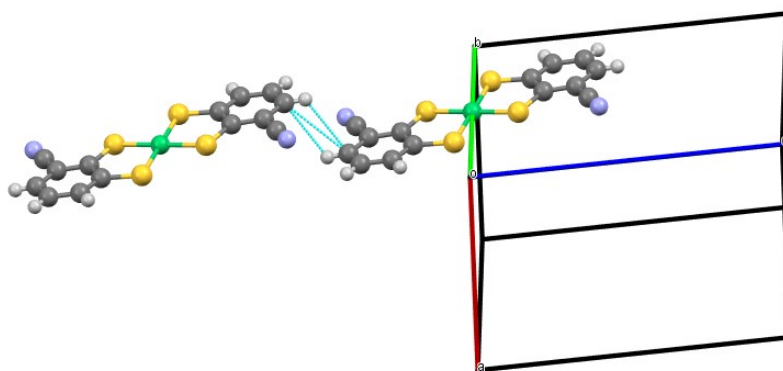

**Figure SM9.** Detail of the C5...C5 and C5...H5 interactions in compound  $\alpha$ -1

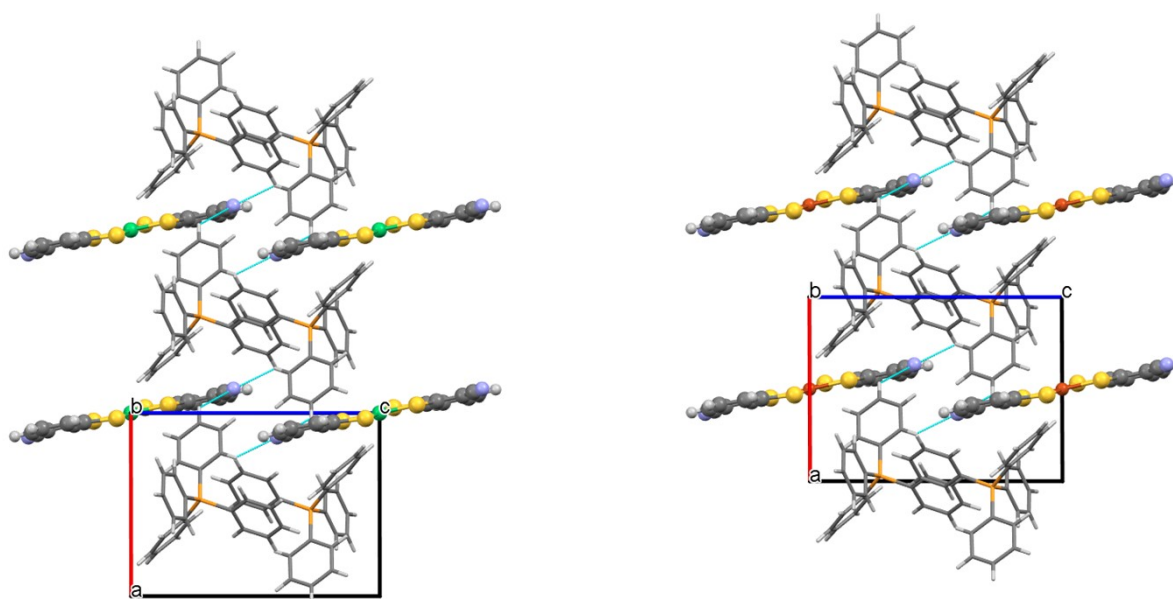

**Figure SM10.** Structural detail of the  $R^2_4(12)$  synthons mediated by the C-H...N $\equiv$ C short contacts, in  $\alpha$ -1 (left) and  $\alpha$ -3 (right).

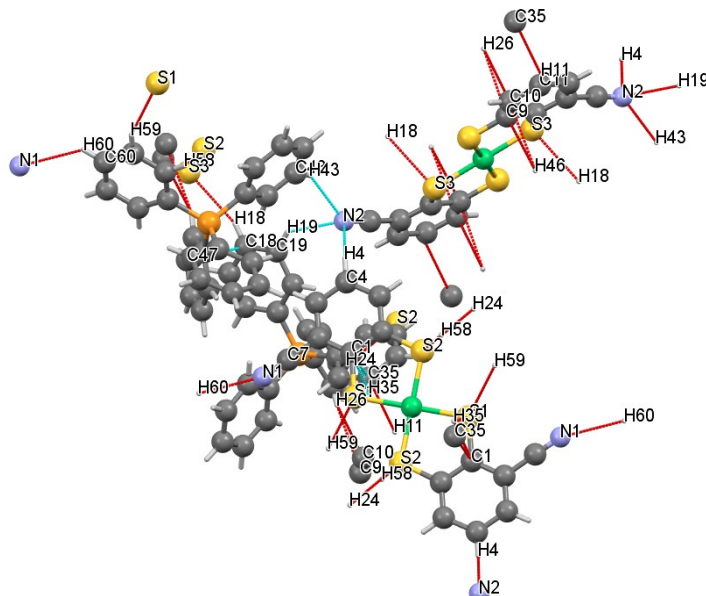

**Table SM5:** Short contact list of compound **1b1**

|               | Short Contacts          | Symmetry operation (*) | Length (Å) | Length- $\Sigma$ VdW (Å) |                                 |
|---------------|-------------------------|------------------------|------------|--------------------------|---------------------------------|
| anion-anion   | C4-H4...N2 $\equiv$ C14 | $x,y,z$                | 2.626      | -0.124                   | C-H...N $\equiv$ C              |
| cation-cation | C18...C47               | $x,y,z$                | 3.308      | -0.092                   | $\pi$ ... $\pi$ <sup>*1/2</sup> |
| anion-cation  | S1...H35                | $x,y,z$                | 2.912      | -0.088                   |                                 |
|               | S1...H59                | $x,-1+y,z$             | 2.874      | -0.126                   |                                 |
|               | S2...H24                | $1-x,-y,1-z$           | 2.993      | -0.007                   |                                 |
|               | S2...H58                | $1-x,1-y,-z$           | 2.749      | -0.251                   |                                 |
|               | S3...H18                | $1-x,1-y,1-z$          | 2.681      | -0.319                   |                                 |
|               | C60-H60...N1-C7         | $2-x,1-y,-z$           | 2.667      | -0.083                   | C-H...N $\equiv$ C              |
|               | C19-H19...N2-C14        | $x,y,z$                | 2.539      | -0.211                   | C-H...N $\equiv$ C              |
|               | C43-H43...N2-C14        | $x,y,z$                | 2.588      | -0.162                   | C-H...N $\equiv$ C              |
|               | C11-H11...C35           | $1-x,-y,1-z$           | 2.836      | -0.064                   | C-H... $\pi$ <sup>*1</sup>      |
|               | C26-H26...C9            | $1-x,-y,1-z$           | 2.679      | -0.221                   | C-H... $\pi$ <sup>*2</sup>      |
|               | C46-H46...C9            | $1-x,-y,1-z$           | 2.730      | -0.170                   | C-H... $\pi$ <sup>*2</sup>      |
|               | C26-H26...C10           | $1-x,-y,1-z$           | 2.634      | -0.233                   | C-H... $\pi$ <sup>*2</sup>      |
|               | C46-H46...C10           | $1-x,1-y,1-z$          | 2.772      | -0.128                   | C-H... $\pi$ <sup>*2</sup>      |
|               | C1...C35                | $x,y,z$                | 2.830      | -0.070                   | $\pi$ ... $\pi$ <sup>*1</sup>   |
|               | C35-H35...C1            | $x,y,z$                | 2.836      | -0.064                   | C-H... $\pi$ <sup>*1</sup>      |
|               | C11-H11...C35           | $1-x,-y,1-z$           | 2.836      | -0.064                   | C-H... $\pi$ <sup>*2</sup>      |

\*1 offset pi/pi stacking

\*2 aromatic CH/pi hydrogen bonds; edge-to-face; T-shape aromatic interaction

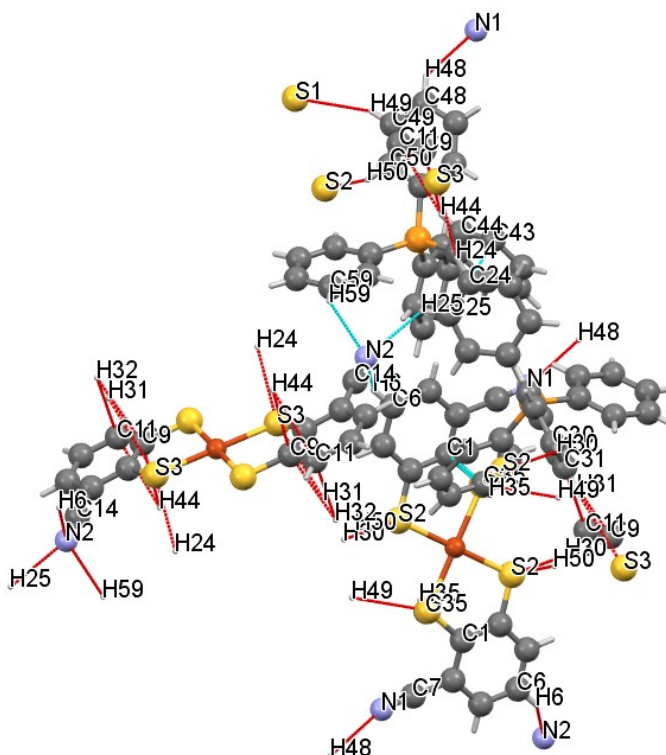

**Table SM6:** Short contacts list of compound  $\beta$ -3

|                | Short Contacts   | Symmetry operation (*) | Length (Å) | Length- $\Sigma$ VdW (Å) |                    |
|----------------|------------------|------------------------|------------|--------------------------|--------------------|
| anion-anion    | C6-H6...N2-C14   | x,y,z                  | 2.709      | -0.041                   | C-H...N $\equiv$ C |
| cation- cation | C24...C43        | x,y,z                  | 3.330      | -0.070                   | $\pi$ ... $\pi$    |
| anion-cation   | S1...H35         | x,y,z                  | 2.949      | -0.051                   |                    |
|                | S1...H49         | 1-x,-y,1-z             | 2.970      | -0.030                   |                    |
|                | S2...H30         | x,-1+y,z               | 2.904      | -0.096                   |                    |
|                | S2...H50         | 1-x,1-y,-z             | 2.782      | -0.218                   |                    |
|                | S3...H31         | 1-x,-y,1-z             | 2.987      | -0.013                   |                    |
|                | S3...H24         | 1-x,1-y,1-z            | 2.675      | -0.325                   |                    |
|                | C48-H48...N1-C7  | 2-x,1-y,-z             | 2.713      | -0.037                   | C-H...N $\equiv$ C |
|                | C25-H25...N2-C14 | x,y,z                  | 2.556      | -0.194                   | C-H...N $\equiv$ C |
|                | C59-H59...N2-C14 | x,y,z                  | 2.599      | -0.151                   | C-H...N $\equiv$ C |
|                | C35-H35...C1     | x,y,z                  | 2.826      | -0.074                   | C-H... $\pi$       |
|                | C32-H32...C9     | 1-x,-y,1-z             | 2.689      | -0.211                   | C-H... $\pi$       |
|                | C32-H32...C11    | 1-x,-y,1-z             | 2.644      | -0.256                   | C-H... $\pi$       |
|                | C44-H44...C9     | 1-x,1-y,1-z            | 2.742      | -0.158                   | C-H... $\pi$       |
|                | C44-H44...C11    | 1-x,1-y,1-z            | 2.772      | -0.128                   | C-H... $\pi$       |
|                | C1...C35         | x,y,z                  | 3.270      | -0.130                   | $\pi$ ... $\pi$    |

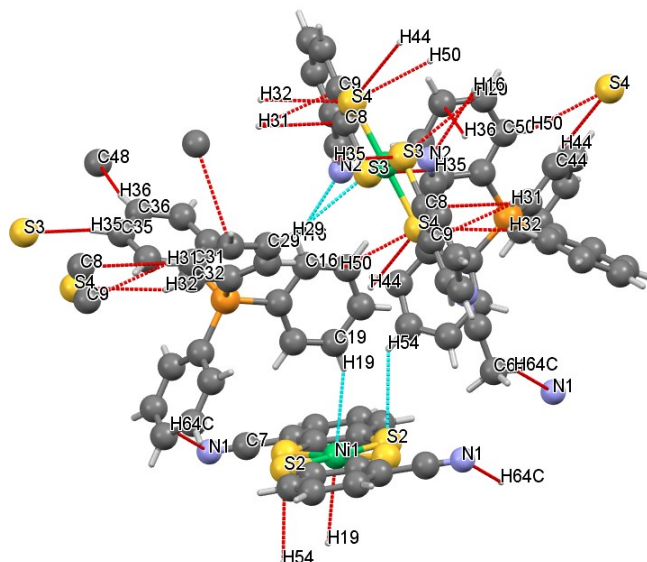

**Table SM7:** Short contacts list of compound **1.CH<sub>3</sub>CN**

|                | Short Contacts   | Symmetry operation (*) | Length (Å) | Length- $\Sigma$ VdW (Å) |                    |
|----------------|------------------|------------------------|------------|--------------------------|--------------------|
| anion-solvent  | C64-H64...N1-C7  | 2-x,1-y,-z             | 2.676      | -0.074                   | C-H...N $\equiv$ C |
| cation- cation | C30...C30        | 1-x,-y,1-z             | 3.301      | -0.099                   | $\pi$ ... $\pi$    |
|                | C36-H36...C48    | -1+x,y,z               | 2.832      | -0.068                   | C-H... $\pi$       |
| anion-cation   | Ni1...H19-C19    | x,y,z                  | 2.759      | -0.071                   |                    |
|                | S2...H54         | 1-x,1-y,-z             | 2.956      | -0.044                   |                    |
|                | S3...H29         | x,y,z                  | 2.959      | -0.041                   |                    |
|                | S3...H35         | 1+x,y,z                | 2.825      | -0.175                   |                    |
|                | S4...H32         | 1-x,-y,1-z             | 2.825      | -0.175                   |                    |
|                | S4...H44         | 2-x,1-y,1-z            | 2.728      | -0.272                   |                    |
|                | S4...H50         | 2-x,1-y,1-z            | 2.699      | -0.301                   |                    |
|                | C16-H16...N2-C14 | x,y,z                  | 2.644      | -0.106                   | C-H...N $\equiv$ C |
|                | C31-H31...C8     | 1-x,-y,1-z             | 2.821      | -0.079                   | C-H... $\pi$       |
|                | C31-H31...C9     | 1-x,-y,1-z             | 2.695      | -0.205                   | C-H... $\pi$       |

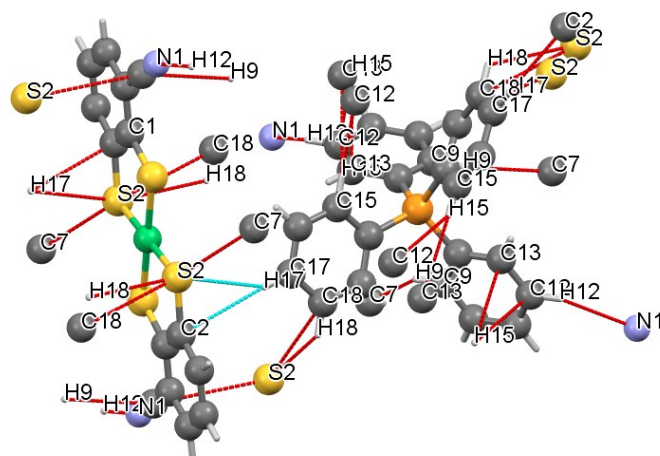

**Table SM8:** Short contact list of compound **2- $\alpha$**

|                | Short Contacts  | Symmetry operation (*) | Length (Å) | Length- $\Sigma$ VdW (Å) |                             |
|----------------|-----------------|------------------------|------------|--------------------------|-----------------------------|
| anion-anion    | S2...C7         | $1/2-x, -1/2+y, 1/2-z$ | 3.582      | 0.082                    |                             |
|                | C3...C4         |                        | 3.510      | 0.110                    |                             |
| cation- cation | C15-H15...C12   | $x, 1-y, -1/2+z$       | 2.934      | 0.034                    | C-H... $\pi$ * <sup>2</sup> |
|                | C15-H15...C13   | $x, 1-y, -1/2+z$       | 2.981      | 0.081                    | C-H... $\pi$ * <sup>2</sup> |
| anion-cation   | S2...H17        | $x, y, z$              | 2.949      | -0.051                   |                             |
|                | S2...H18        | $1/2-x, -1/2+y, 1/2-z$ | 2.962      | -0.038                   |                             |
|                | C12-H12...N1-C7 | $-1/2+x, 1.5-y, 1/2+z$ | 2.776      | 0.026                    | C-H...N $\equiv$ C          |

\*2 aromatic CH/ $\pi$  hydrogen bonds; edge-to-face; T-shape aromatic interaction



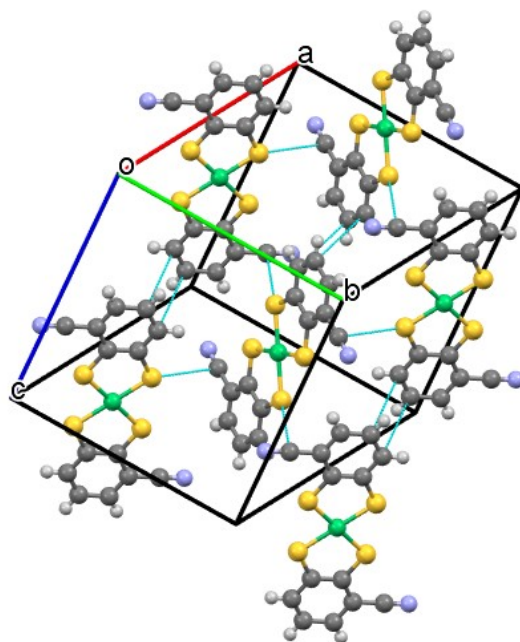

**Figure SM11.** Structural detail of the C...C and C...S interactions in the **2- $\alpha$**  anionic layer.

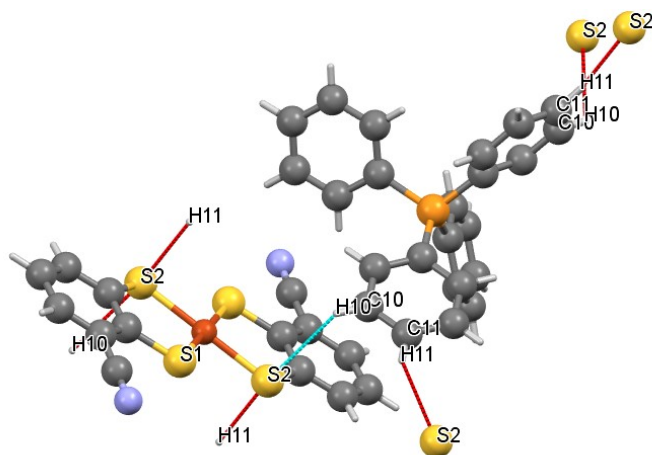

**Table SM9:** Short contacts list of compound 4- $\alpha$

|                | Short Contacts  | Symmetry operation (*)         | Length(Å) | Length- $\Sigma$ VdW (Å) |                    |
|----------------|-----------------|--------------------------------|-----------|--------------------------|--------------------|
| anion-anion    | S2...C7         | $\frac{1}{2}-x, -1/2+y, 1/2-z$ | 3.562     | 0.062                    |                    |
|                | C3...C4         | $\frac{1}{2}-x, 1.5-y, -z$     | 3.496     | 0.096                    |                    |
| cation- cation | C13-H13...C15   | $-x, y, 1.5-z$                 | 2.973     | 0.073                    | C-H... $\pi^{*2}$  |
|                | C13-H13...C16   | $-x, y, 1.5-z$                 | 0.918     | 0.018                    | C-H... $\pi^{*2}$  |
| anion-cation   | S2...H11        | $x, 1-y, -1/2+z$               | 2.955     | -0.045                   |                    |
|                | S2...H10        | $\frac{1}{2}-x, 1.5-y, 1-z$    | 2.961     | -0.039                   |                    |
|                | S2...C10        | $x, y, z$                      | 3.546     | 0.046                    |                    |
|                | C16-H16...N1-C7 | $-1/2+x, 1/2+y, z$             | 2.792     | 0.042                    | C-H...N $\equiv$ C |

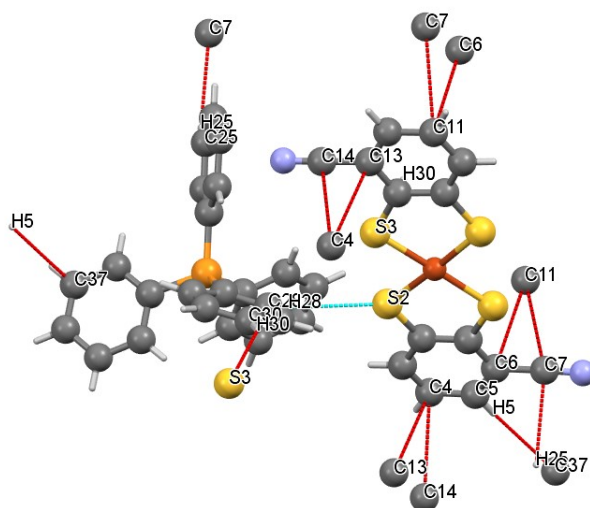

**Table SM10:** Short contacts list of compound 4-  $\beta$

|              | Short Contacts | Symmetry operation (*) | Length(Å) | Length- $\Sigma$ VdW(Å) |                 |
|--------------|----------------|------------------------|-----------|-------------------------|-----------------|
| anion-anion  | C4-C13         | 1-x,-1/2+y,1-z         | 3.349     | -0.051                  | $\pi \dots \pi$ |
|              | C4-C14         | 1-x,-1/2+y,1-z         | 3.349     | -0.051                  | $\pi \dots \pi$ |
|              | C6-C11         | 2-x,-1/2+y,1-z         | 3.302     | -0.098                  | $\pi \dots \pi$ |
|              | C7-C11         | 2-x,-1/2+y,1-z         | 3.374     | -0.026                  | $\pi \dots \pi$ |
| anion-cation | S2...H28       | x,y,z                  | 2.933     | -0.067                  |                 |
|              | S3...H30       | 1+x,y,1+z              | 2.995     | -0.005                  |                 |
|              | C25-H25...C7   | x,y,1+z                | 2.860     | -0.040                  | C-H... $\pi$    |
|              | C5-H5...C37    | 1+x,y,1+z              | 2.857     | -0.043                  | C-H... $\pi$    |

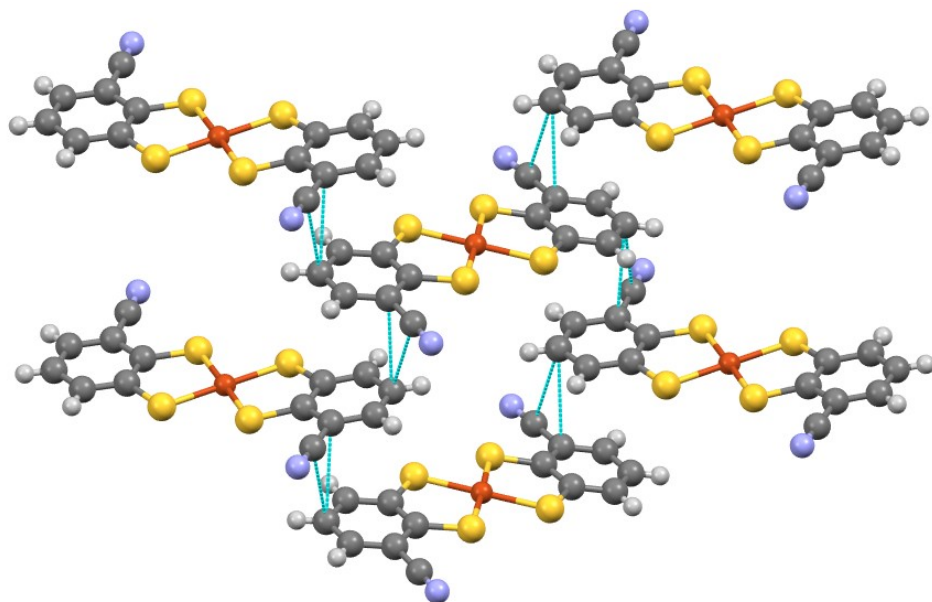

**Figure SM12.** Structural detail of the C...C interactions in the  $\beta$ -4 anionic layer.
